# Supplementary material
Source: Springer Nature journal article supplement (https://www.springermedizin.de/resource/supplementary/12936_2010_1754_MOESM4_ESM.pdf/9541670)
Supplement: MOESM4 [file 9541670]

Geometric mean gametocyte density

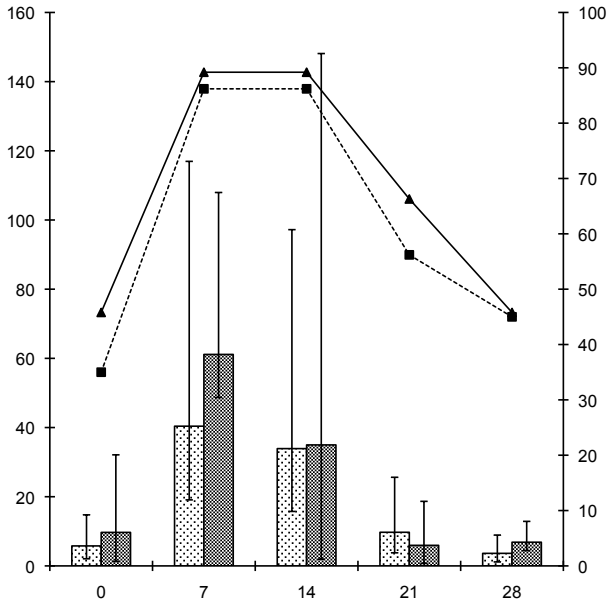

Time (days)

gametocyte carriers %

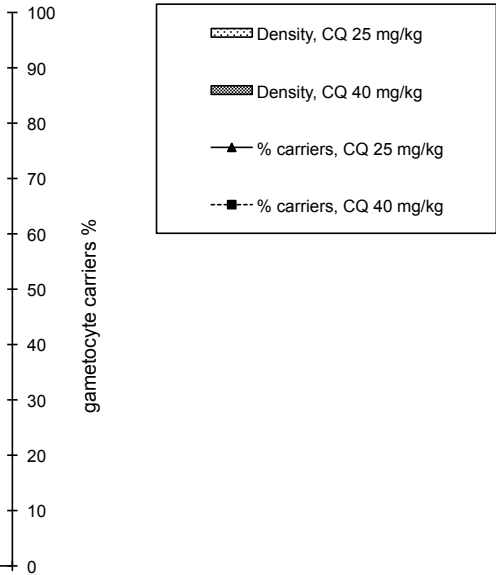

Density, CQ 25 mg/kg

Density, CQ 40 mg/kg

% carriers, CQ 25 mg/kg

% carriers, CQ 40 mg/kg
